# Supplementary material for: Efficient Helium Separation with Two-Dimensional Metal–Organic Framework Fe/Ni-PTC: A Theoretical Study
Source: MDPI journal article supplement (doi:10.3390/membranes11120927), 2021-11-26
Supplement: s1 [file s1]

# Supplementary Information for

## Efficient helium separation with two-dimensional metal-organic framework: Fe/Ni-PTC

Jingyuan Wang <sup>1</sup>, Yixiang Li <sup>1</sup>, Yanmei Yang <sup>2</sup>, Yong-Qiang Li <sup>1</sup>, Mingwen Zhao <sup>1</sup>, Weifeng Li <sup>1</sup>, Jing Guan <sup>1,\*</sup>, Yuanyuan Qu <sup>1,\*</sup>

<sup>1</sup> School of Physics, Shandong University, Jinan, 250100, Shandong, China; 1327942320@qq.com (J.W.); lyx1113@mail.sdu.edu.cn (Y.L.); yqli@sdu.edu.cn(Y.L.); zmw@sdu.edu.cn (M.Z.); lwf@sdu.edu.cn (W.L.); guanjing@sdu.edu.cn (J.G.); quyuanyuan@sdu.edu.cn (Y.Q.)

<sup>2</sup> College of Chemistry, Chemical Engineering and Materials Science, Collaborative Innovation Center of Functionalized Probes for Chemical Imaging in Universities of Shandong, Key Laboratory of Molecular and Nano Probes, Ministry of Education, Institute of Molecular and Nano Science, Shandong Normal University, Jinan, 250014, China; yym@sdsu.edu.cn

\*Correspondence: quyuanyuan@sdu.edu.cn or guanjing@sdu.edu.cn

## Supplementary Figures

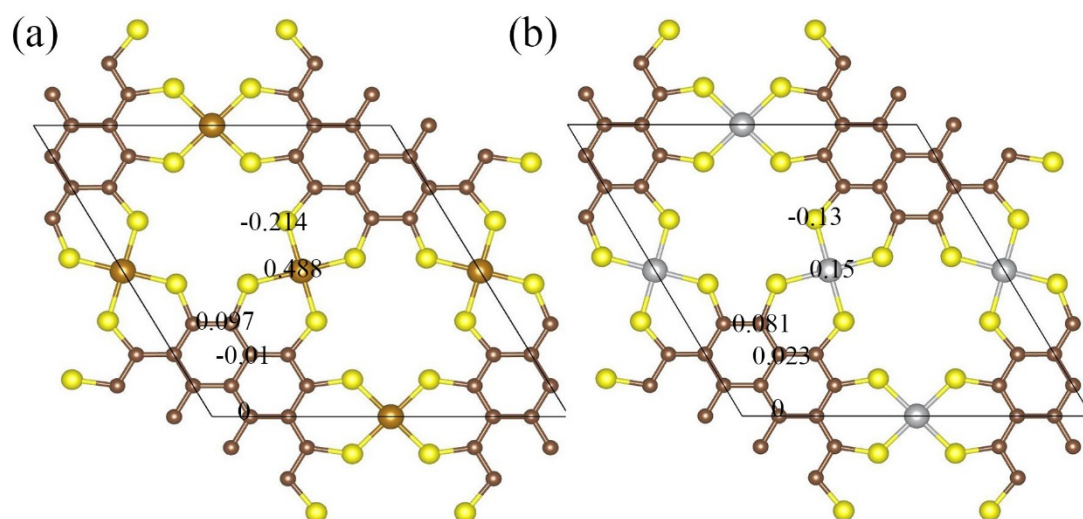

**Figure S1.** The atomic charges for (a) Fe-PTC membrane; (b) Ni-PTC membrane where the charges are denoted on respective atoms.

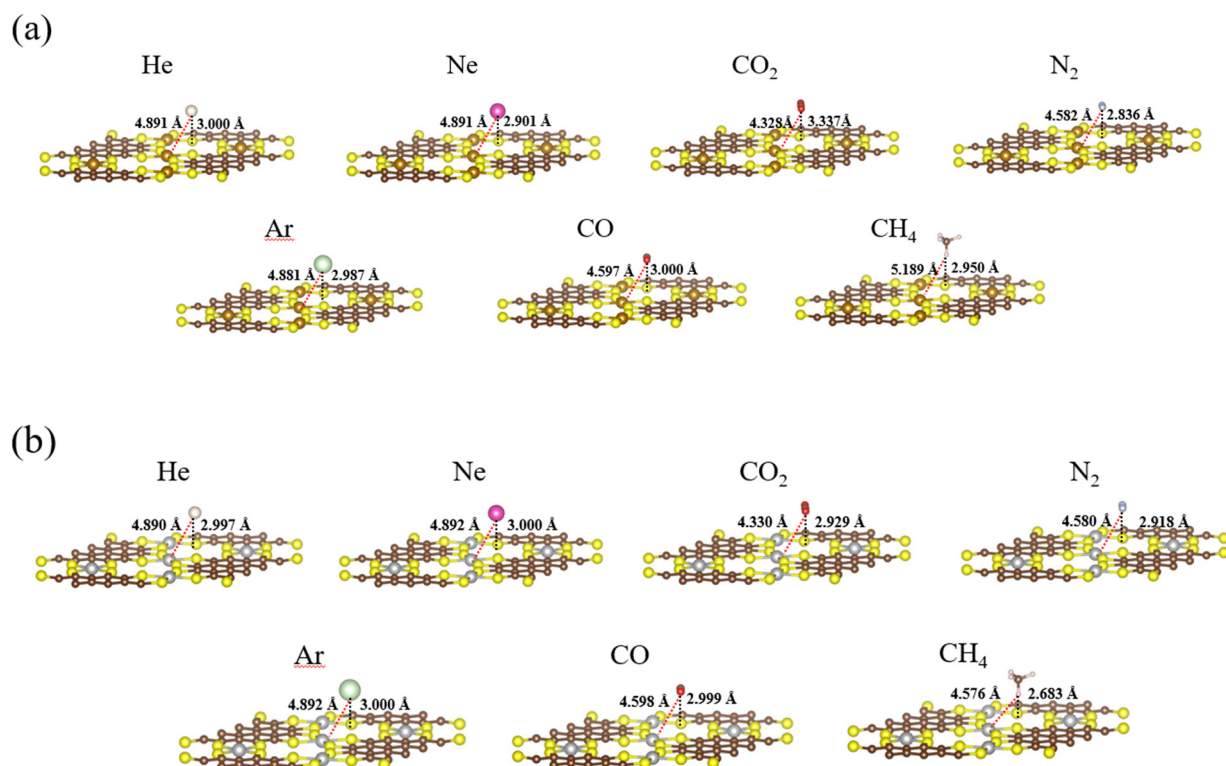

**Figure S2.** The schematic diagram of the adsorption state of each gas molecule on the (a) Fe-PTC and (b) Ni-PTC membranes. The black dotted lines represent the distance from the gas molecules to the membrane, and the red dotted lines represent the distance from the gas molecules to the Fe/Ni cation.

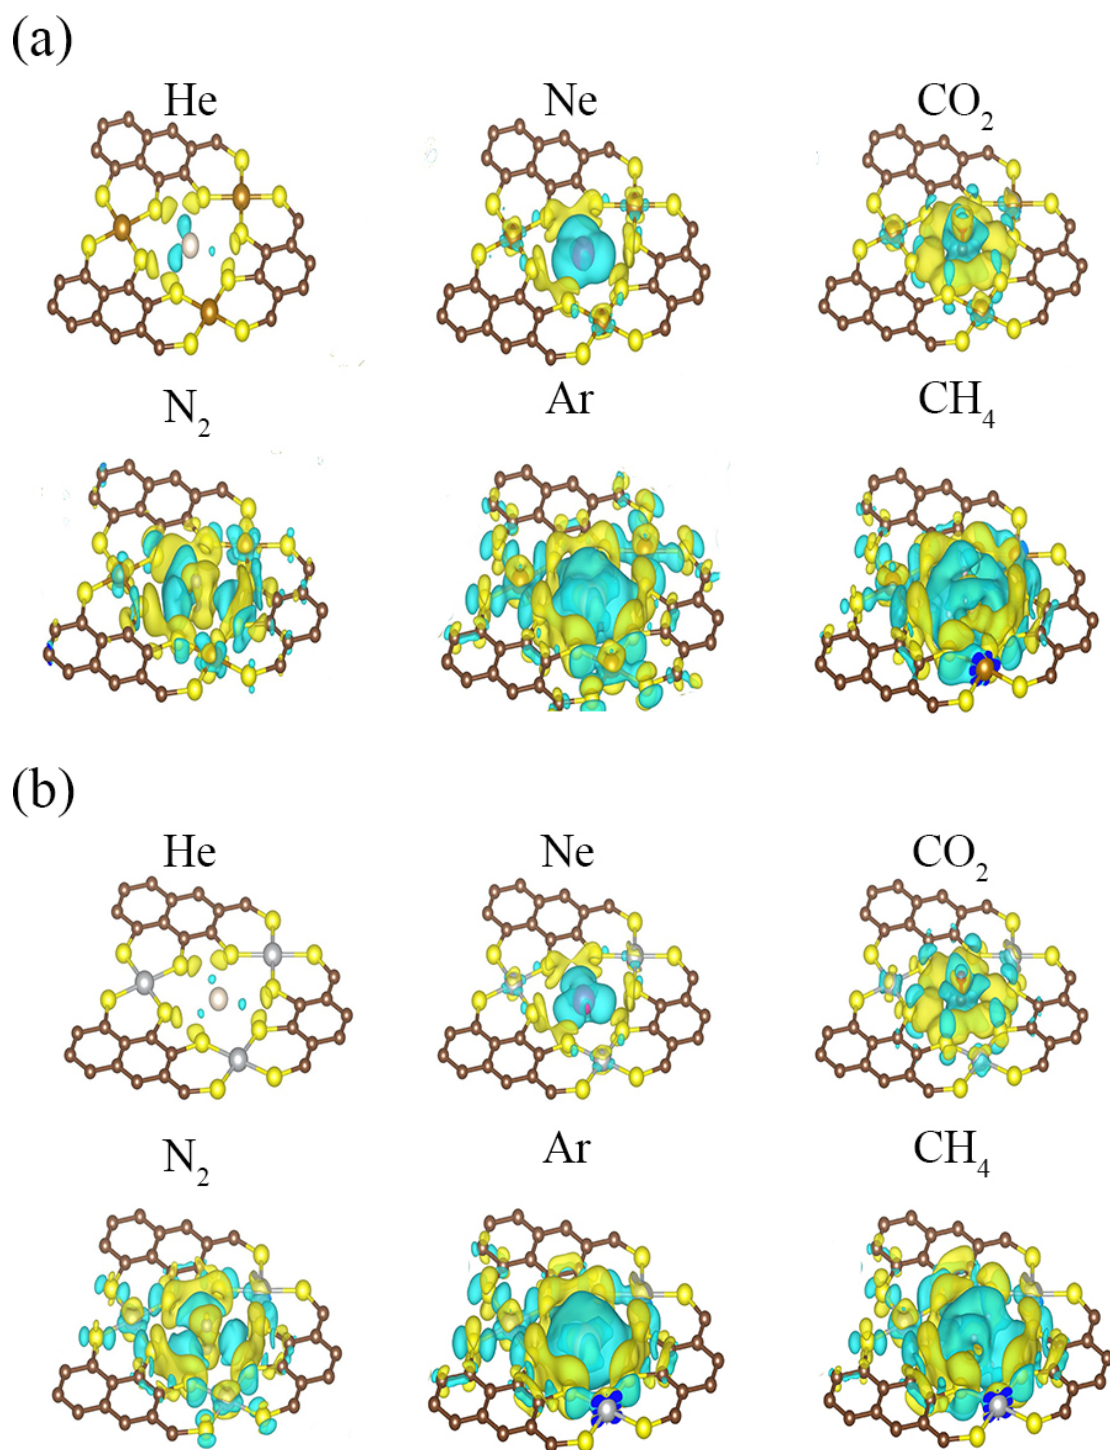

**Figure S3.** The electron density difference maps at the transition state for both (a) gas-Fe-PTC and (b) gas-Ni-PTC systems. (isovalue of  $0.0003\text{\AA}^{-3}$ )

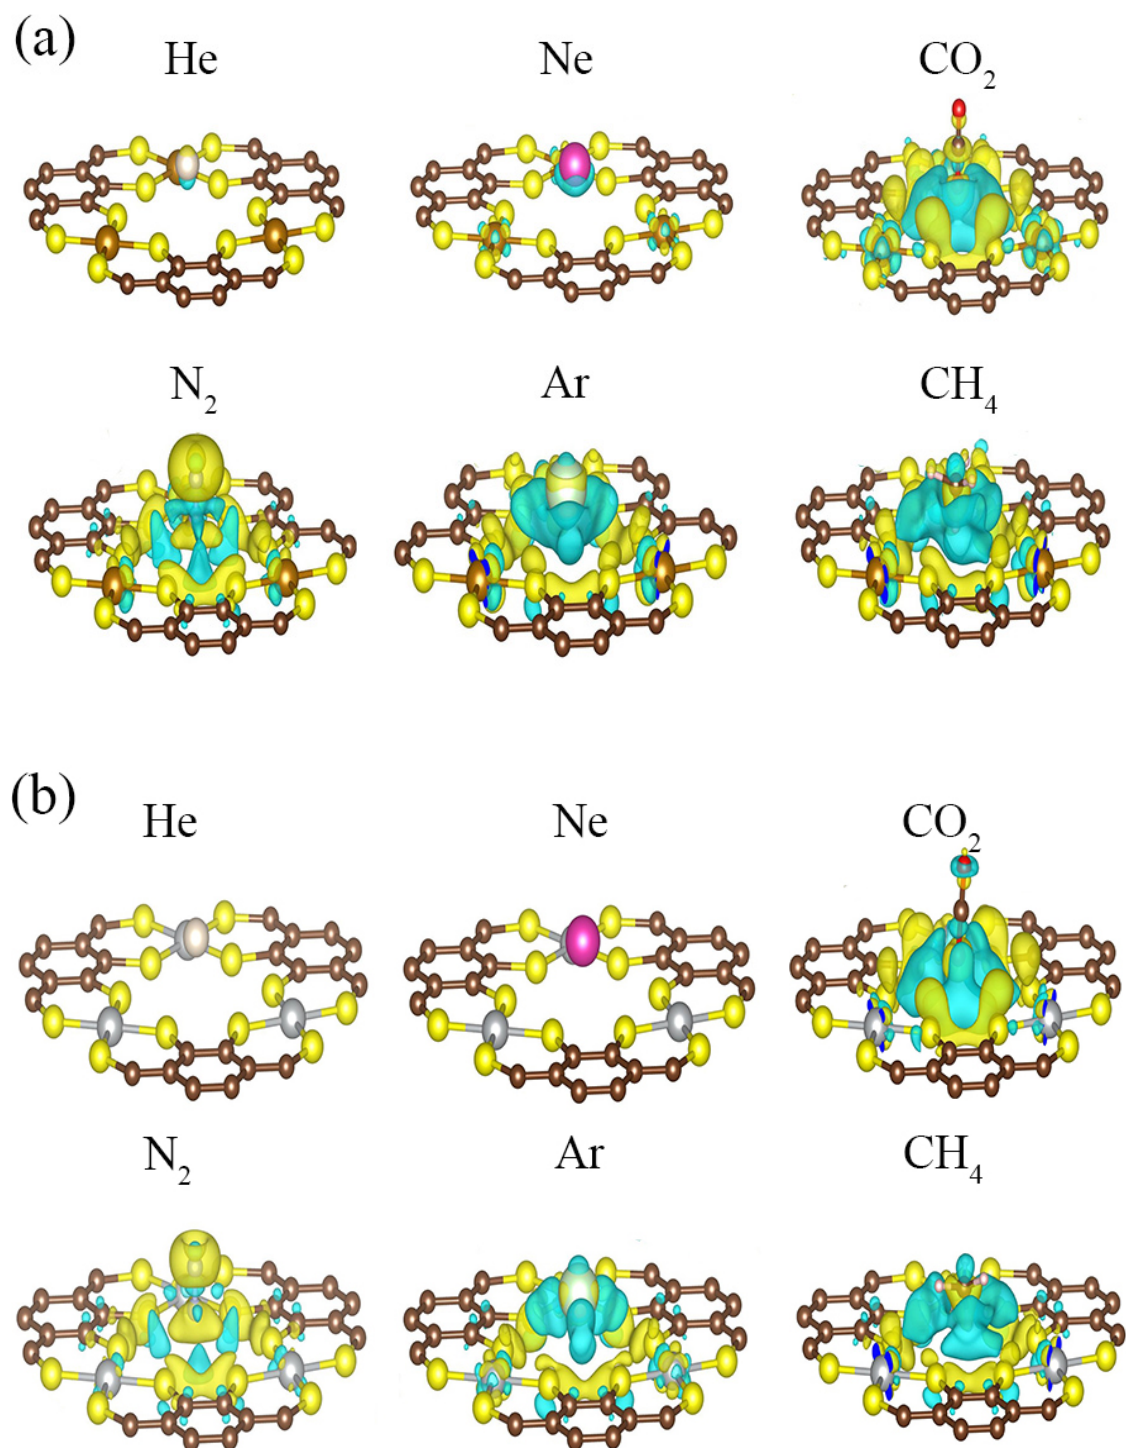

**Figure S4.** The electron density difference maps at the state near the transition state for both (a) gas-Fe-PTC and (b) gas-Ni-PTC systems. (isovalue of  $0.0003\text{\AA}^{-3}$ )

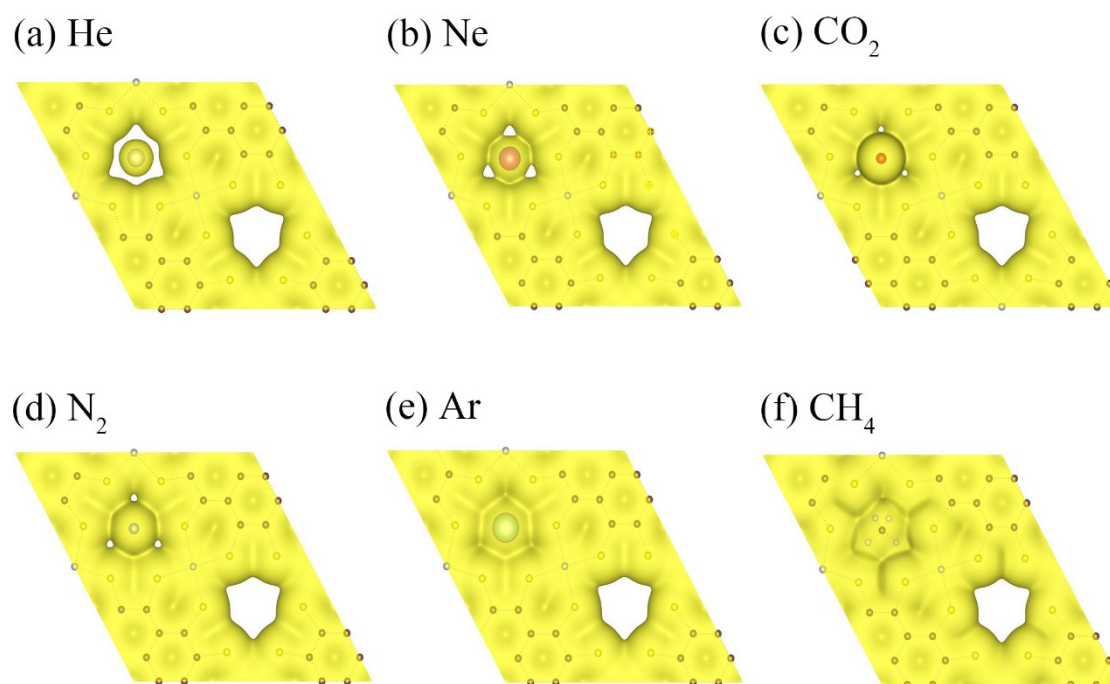

**Figure S5.** Electron-density isosurfaces for (a) He, (b) Ne, (c) CO<sub>2</sub>, (d) N<sub>2</sub>, (e) Ar, and (f) CH<sub>4</sub> molecules passing through the pore of the Ni-PTC membrane (isovalue of 0.01 Å<sup>-3</sup>).



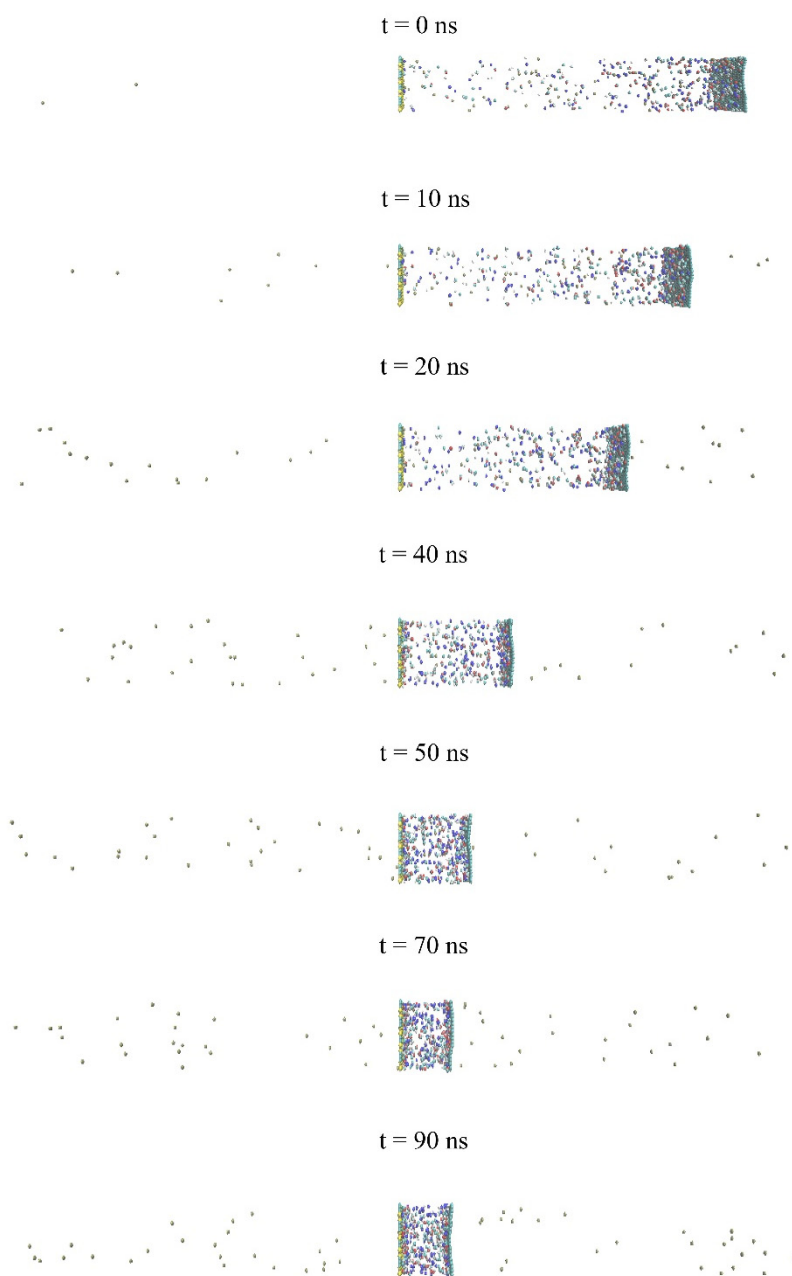

**Figure S6.** The snapshots of the gas mixture permeating through Fe-PTC membrane.

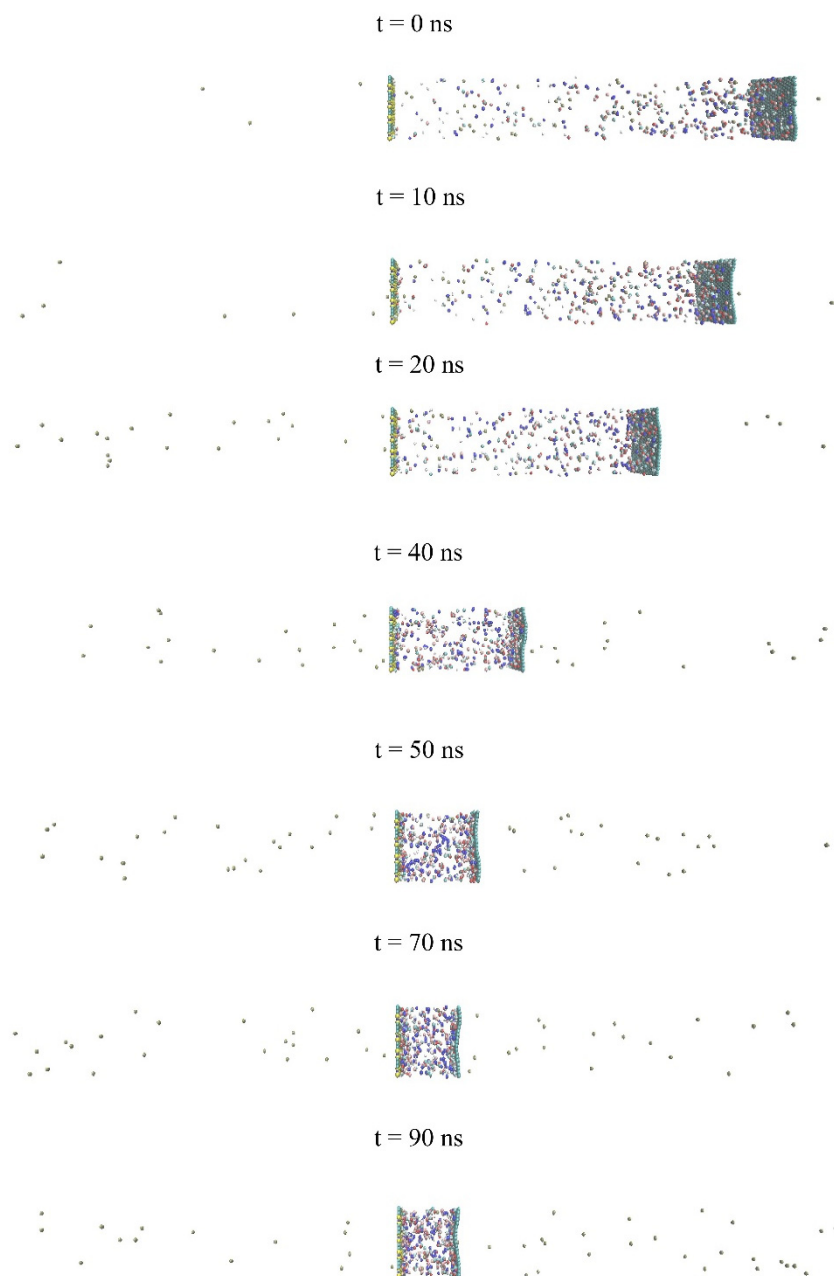

**Figure S7.** The snapshots of the gas mixture permeating through Ni-PTC membrane.

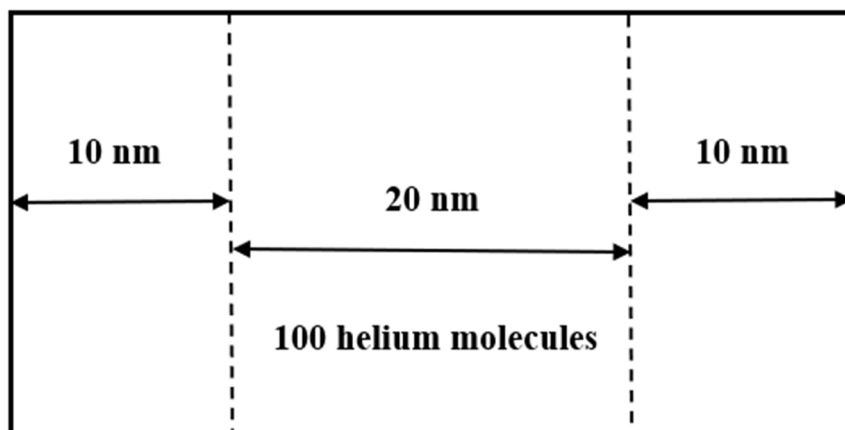

**Figure S8.** Molecular dynamics model for calculating permeance. The positions of Fe/Ni-PTC membranes are indicated by the dotted lines.

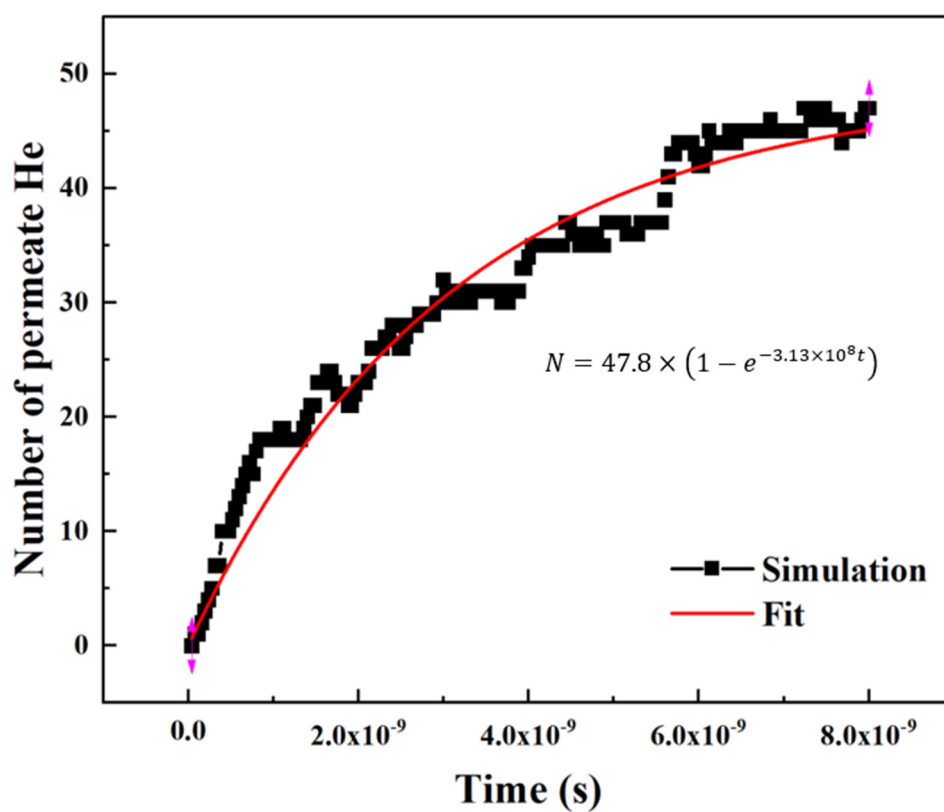

**Figure S9.** The number of permeated He molecules versus simulation time.



## Supplementary Tables

**Table S1.** The convergence of the energy cutoff and the k-point mesh.

| Membrane | K-points              | Cutoff (eV) | System energy (eV) | Energy/atom (eV) |
|----------|-----------------------|-------------|--------------------|------------------|
| Fe-PTC   | $3 \times 3 \times 1$ | 500         | -281.0441          | -7.2063          |
|          |                       | 550         | -281.0529          | -7.2065          |
|          | $5 \times 5 \times 1$ | 500         | -281.0479          | -7.2064          |
|          |                       | 550         | -281.0565          | -7.2066          |
|          | $7 \times 7 \times 1$ | 500         | -281.0476          | -7.2063          |
| Ni-PTC   | $3 \times 3 \times 1$ | 500         | -281.8433          | -7.2267          |
|          |                       | 550         | -281.8509          | -7.2269          |
|          | $5 \times 5 \times 1$ | 500         | -281.8368          | -7.2266          |
|          |                       | 550         | -281.8433          | -7.2268          |
|          | $7 \times 7 \times 1$ | 500         | -281.8431          | -7.2268          |

**Table S2.** The optimized vectors (a and b) upon gas adsorption, the vector changes percentage upon gas adsorption and the single point energy difference between complexes with unoptimized vectors and that with optimized vectors upon gas adsorption ( $\Delta E$ ).

| Membrane | Gas             | a = b (Å) | a (b) changes percentage | $\Delta E$ (eV) |
|----------|-----------------|-----------|--------------------------|-----------------|
| Fe-PTC   | He              | 13.55545  | -0.034%                  | 0.0005          |
|          | Ne              | 13.54668  | -0.098%                  | 0.0109          |
|          | CO <sub>2</sub> | 13.55272  | -0.054%                  | 0.0047          |
|          | N <sub>2</sub>  | 13.55653  | -0.026%                  | 0.0003          |
|          | CO              | 13.54922  | -0.079%                  | 0.0049          |
|          | Ar              | 13.55370  | -0.046%                  | 0.0009          |
|          | CH <sub>4</sub> | 13.55078  | -0.068%                  | 0.0227          |
| Ni-PTC   | He              | 13.57258  | +0.075%                  | 0.0331          |
|          | Ne              | 13.56926  | +0.068%                  | 0.0135          |
|          | CO <sub>2</sub> | 13.56312  | +0.005%                  | 0.0009          |
|          | N <sub>2</sub>  | 13.57570  | +0.098%                  | 0.0019          |
|          | CO              | 13.57236  | +0.073%                  | 0.0028          |
|          | Ar              | 13.57218  | +0.072%                  | 0.0024          |
|          | CH <sub>4</sub> | 13.57020  | +0.058%                  | 0.0008          |

**Table S3.** Force field parameters (van der Waals terms and partial charges) for CO<sub>2</sub> and N<sub>2</sub>.

| CO <sub>2</sub> |                   |              |         |
|-----------------|-------------------|--------------|---------|
|                 | $\varepsilon$ (K) | $\sigma$ (Å) | Q (e)   |
| C               | 28.13             | 2.757        | 0.6512  |
| O               | 80.51             | 3.033        | -0.3256 |
| bonds           | length(Å)         |              |         |
| C-O             | 1.149             |              |         |
| N <sub>2</sub>  |                   |              |         |
|                 | $\varepsilon$ (K) | $\sigma$ (Å) | Q (e)   |
| N               | 36.4              | 3.318        | -0.4048 |
| Center-Of-Mass  | 0                 | 0            | 0.8096  |
| bonds           | length (Å)        |              |         |
| N-N             | 1.098             |              |         |

**Table S4.** Atomic charges for CO and CH<sub>4</sub> molecules

| CO |         | CH <sub>4</sub> |         |
|----|---------|-----------------|---------|
|    | Q (e)   |                 | Q (e)   |
| C  | 0.0344  | C               | -0.3520 |
| O  | -0.0344 | H               | 0.0880  |

## Supplementary Method

### Method for calculating permeance

In the simulation system to calculate He permeance, we randomly placed 100 helium molecules in between two layers of Fe/Ni-PTC membrane, while the x, y and z coordinates of the Fe/Ni-PTC membrane were kept frozen. The simulation box has a dimension of 4.068 nm × 4.698 nm × 40 nm. The molecular dynamics calculation model is shown in Figure S8. First, the permeance of helium through the membrane material was tested at 300 K. The relationship between flux  $J$  (mol s<sup>-1</sup>) and permeance  $S$  (mol s<sup>-1</sup> m<sup>-2</sup> Pa<sup>-1</sup>) is defined by the following formula <sup>[1-2]</sup>:

$$J = \frac{1}{N_A} \frac{dN}{dt} = A_g \cdot \Delta P \cdot S \quad (1)$$

where  $A_g$  is the membrane area of Fe/Ni-PTC used in our MD simulations ( $A_g = 3.82 \times 10^{-17}$  m<sup>2</sup>),  $\Delta P$  is the pressure drop across the membrane,  $N$  is the number of permeated He molecules,  $t$  is the MD simulation time, and  $N_A$  is the Avogadro constant.  $\Delta P$  is dependent on the molecular numbers  $N$ . The initial pressure is estimated to be  $9.16 \times 10^5$  Pa based on ideal gas law. Therefore, the expression for  $\Delta P$  is as follows:

$$\Delta P = \frac{100 - N_{ad} - 2N}{100} \times 9.16 \times 10^5 \text{ Pa} \quad (2)$$

where  $N_{ad}$  stands for the average number of He molecules adsorbed on the Fe/Ni-PTC membrane. After integrating Eq. (1), we obtained:

$$N = 47.8 \times (1 - e^{-4.98 \times 10^{11} St}) \quad (3)$$

in which  $B = 4.98 \times 10^{11}$  S is the exponent of time decay. Then, Eq. (3) is applied to fit the time-dependent number profiles of permeated He molecules (Figure S9). The fitted parameter  $B = 4.98 \times 10^{11}$  S is calculated to be  $3.13/3.29 \times 10^8$ , and thus the He permeance ( $S$ ) is found to be  $6.3/6.6 \times 10^{-4}$  mol s<sup>-1</sup> m<sup>-2</sup> Pa<sup>-1</sup>. Based on the same method, the He permeances of Fe/Ni-PTC membrane at different temperatures have also been computed.
